# Supplementary material
Source: Royal Society of Chemistry journal article supplement (doi:10.1039/d6nr00658b)
Supplement: d6nr00658b1.pdf [file d6nr00658b1.pdf]

## Supplementary Information

### Top-down and Bottom-up Reconstruction of Matter in Charged Water Microdroplets

Prakrati Patidar,<sup>a</sup> Anubhav Mahapatra,<sup>a</sup> Bhagyashri Soni,<sup>a</sup> Soham Chowdhury,<sup>a</sup> Sujan Manna,<sup>a</sup> Amoghavarsha Ramachandra Kini,<sup>a</sup> Anirban Som,<sup>a</sup> Depanjan Sarkar\*,<sup>ab</sup> and Thalappil Pradeep\*<sup>abc</sup>

<sup>a</sup> DST Unit of Nanoscience (DST UNS) & Thematic Unit of Excellence (TUE), Department of Chemistry

Indian Institute of Technology Madras (IITM)  
Chennai 600036, India.

<sup>b</sup> Centre of Excellence on Molecular Materials and Functions, Department of Chemistry

Indian Institute of Technology Madras (IITM)  
Chennai 600036, India.

<sup>c</sup> International Centre for Clean Water

2nd Floor, B-Block, IIT Madras Research Park, Kanagam Road  
Taramani, Chennai 600113, India.

E-mail: [depanjan\\_coe@icsrpis.iitm.ac.in](mailto:depanjan_coe@icsrpis.iitm.ac.in), [pradeep@iitm.ac.in](mailto:pradeep@iitm.ac.in)

## Table of Contents

| Serial No | Description                                                                | Page No. |
|-----------|----------------------------------------------------------------------------|----------|
| 1         | Experimental Section                                                       | S3       |
| 2         | Experimental data obtained for the top-down fragmentation of silver flakes | S5       |
| 3         | XPS spectrum of copper nanoparticles formed by the top-down approach       | S6       |
| 4         | Voltage-dependent Cu particle disintegration                               | S7       |

## Experimental section

### Materials

Silver powder (APS 4–7  $\mu\text{m}$ , 99.9% metal basis) and copper powder (APS 10  $\mu\text{m}$ , 99.9% metal basis) were purchased from Thermo Scientific, USA. Silver flakes ( $\leq 10$   $\mu\text{m}$ ,  $\geq 99.9\%$  trace metal basis) and gold powder ( $\geq 99.9\%$  trace metal basis) were purchased from Sigma-Aldrich, USA. In contrast, silver acetate ( $\text{AgOAc}$ ,  $\geq 99\%$ ) and gold(III) acetate ( $[\text{Au}(\text{OAc})_3]$ ,  $\geq 99\%$ ) were purchased from Sigma-Aldrich, India. Copper acetate monohydrate ( $[(\text{CH}_3\text{COO})_2\text{Cu}\cdot\text{H}_2\text{O}]$ ,  $\geq 98\%$ ) was purchased from Merck Specialities, India. Methylene blue was also purchased from Sigma-Aldrich, India. All products were used as received without further purification. Ultrapure water (resistivity  $> 18.2$   $\text{M}\Omega\cdot\text{cm}$ ) was used for all aqueous solution preparations.

### Preparation of precursor suspensions and solutions

For the top-down approach, 0.5 mg of metal powder was weighed and suspended in 1 mL of ultrapure water, and the freshly prepared suspension was loaded into a Hamilton syringe for electrospray. For the bottom-up approach, 5 mM solutions of silver acetate and copper acetate were prepared in water; in contrast, gold acetate was prepared in acetonitrile by sonicating for 30 min, then centrifuging, and the supernatant was collected for experiments. These freshly prepared solutions were loaded into n-ESI glass electrospray emitters (inner diameter 25–30  $\mu\text{m}$ ).

### Electrospray deposition setup

For the top-down experiments, a custom-built electrospray ionization (ESI) setup was employed to generate microdroplets. A gastight Hamilton syringe (0.5 mL) fitted with a 22-gauge needle (inner diameter: 413  $\mu\text{m}$ ) was connected to a fused-silica capillary (50  $\mu\text{m}$  inner diameter) using a union connector. The syringe needle was electrically connected to a high-voltage power supply, while a carbon-coated copper TEM grid (300 mesh) placed on the plate collector served as the grounded counter-electrode (carbon-coated copper TEM grids were used for silver and gold experiments, while carbon-coated gold TEM grids were used for copper experiments). The flow rate of 0.1  $\text{mL h}^{-1}$  was precisely controlled using a stepper motor with 400 steps per rotation, and deposition experiments were carried out under ambient conditions for 30 min. The polyimide-coated fused-silica capillary was obtained from Polymicro Technologies<sup>TM</sup> (Molex, USA), while the union connector, PEEK tubing, and ferrules were purchased from IDEX Health & Science (USA).

For bottom-up experiments, a custom-built nanoelectrospray ionization (nESI) source was mounted on a burette stand. The emitter was positioned 2 cm from the ground electrode, and a potential of

approximately 2.5 kV was applied to induce electrospray from the emitter. TEM grids, cleaned and placed on an indium tin oxide (ITO)-coated glass slide, were used as the ground electrode.

### **Characterization**

To image the morphology of the parent metal powders, a Thermo Fisher Scientific Verios G4 UC high-resolution field-emission scanning electron microscope (FESEM) was used at an accelerating voltage of 10 kV and an emission current of 0.10 nA. For nanoparticle imaging, a Thermo Fisher Scientific Talos™ F200i transmission electron microscope (TEM) was used at 200 kV. High-angle annular dark-field scanning transmission electron microscopy (HAADF-STEM) and energy-dispersive X-ray spectroscopy (EDS) were employed for elemental mapping of nanoparticles. To remove surface impurities and render the carbon-coated TEM grids more hydrophilic, a glow discharge was performed using a Quorum GloQube Plus. Lattice fringes in HRTEM images were measured using Gatan Microscopy software. UV–visible spectra were recorded using a PerkinElmer Lambda 365 spectrophotometer. XPS was performed using an ESCA probe TPD spectrometer (Omicron) with polychromatic Al  $\text{K}\alpha$  ( $h\nu = 1486.6$  eV) X-ray source to comprehend the chemical oxidation states of elements.

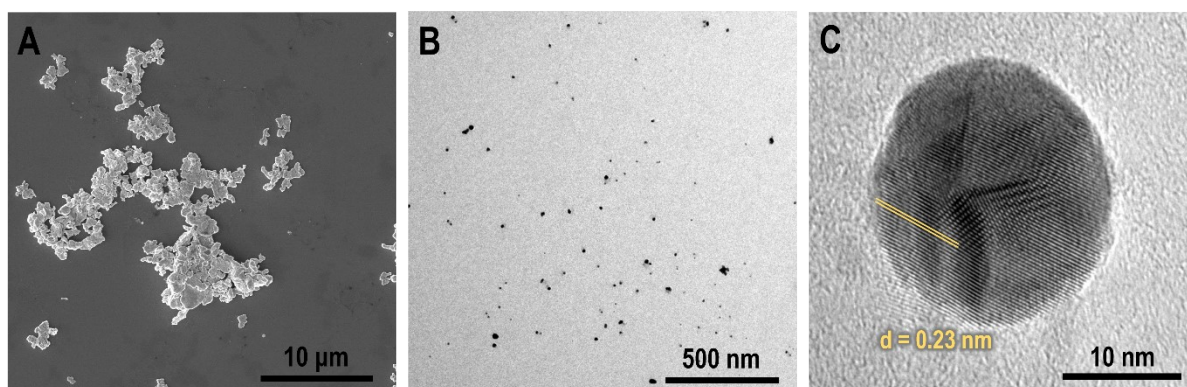

**Figure S1.** Experimental data obtained for the top-down fragmentation of silver flakes. A) SEM image of the parent silver flakes. B) Large-area TEM image of the fragmented nanoparticles. C) HRTEM image of a representative nanoparticle.

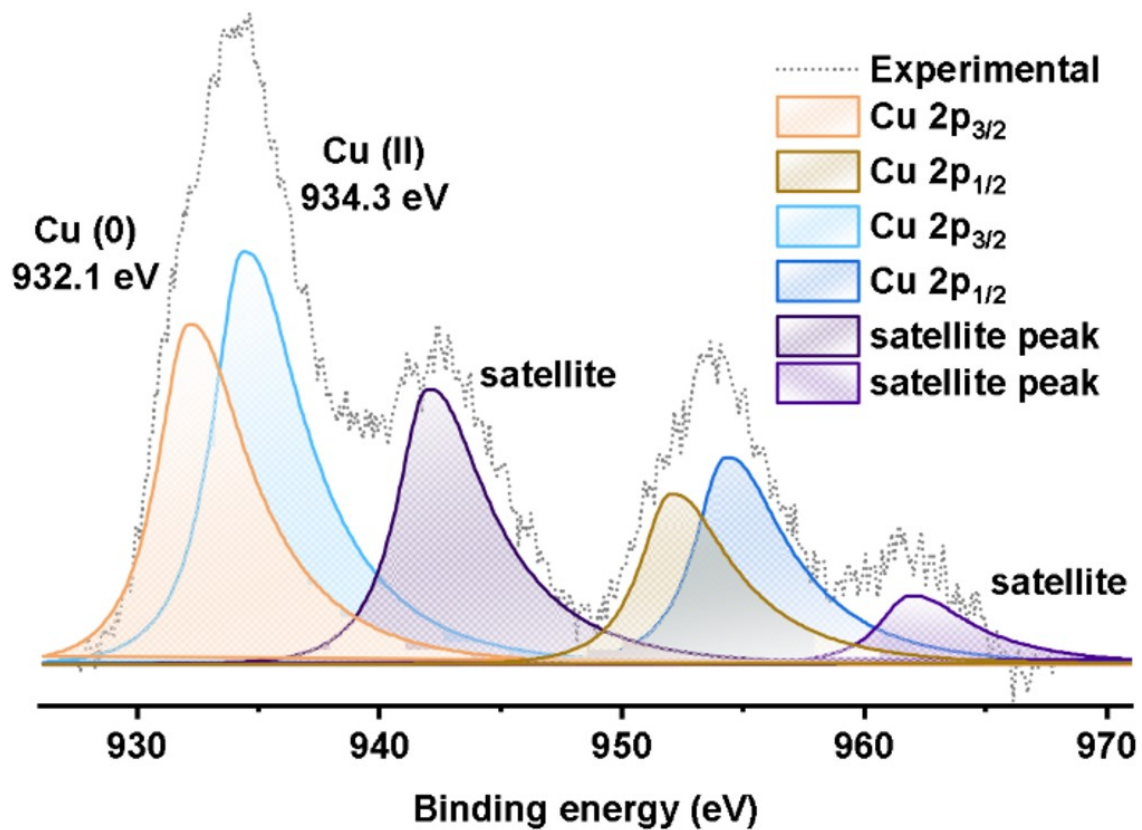

Figure S2. XPS spectrum of copper nanoparticles formed by the top-down approach.

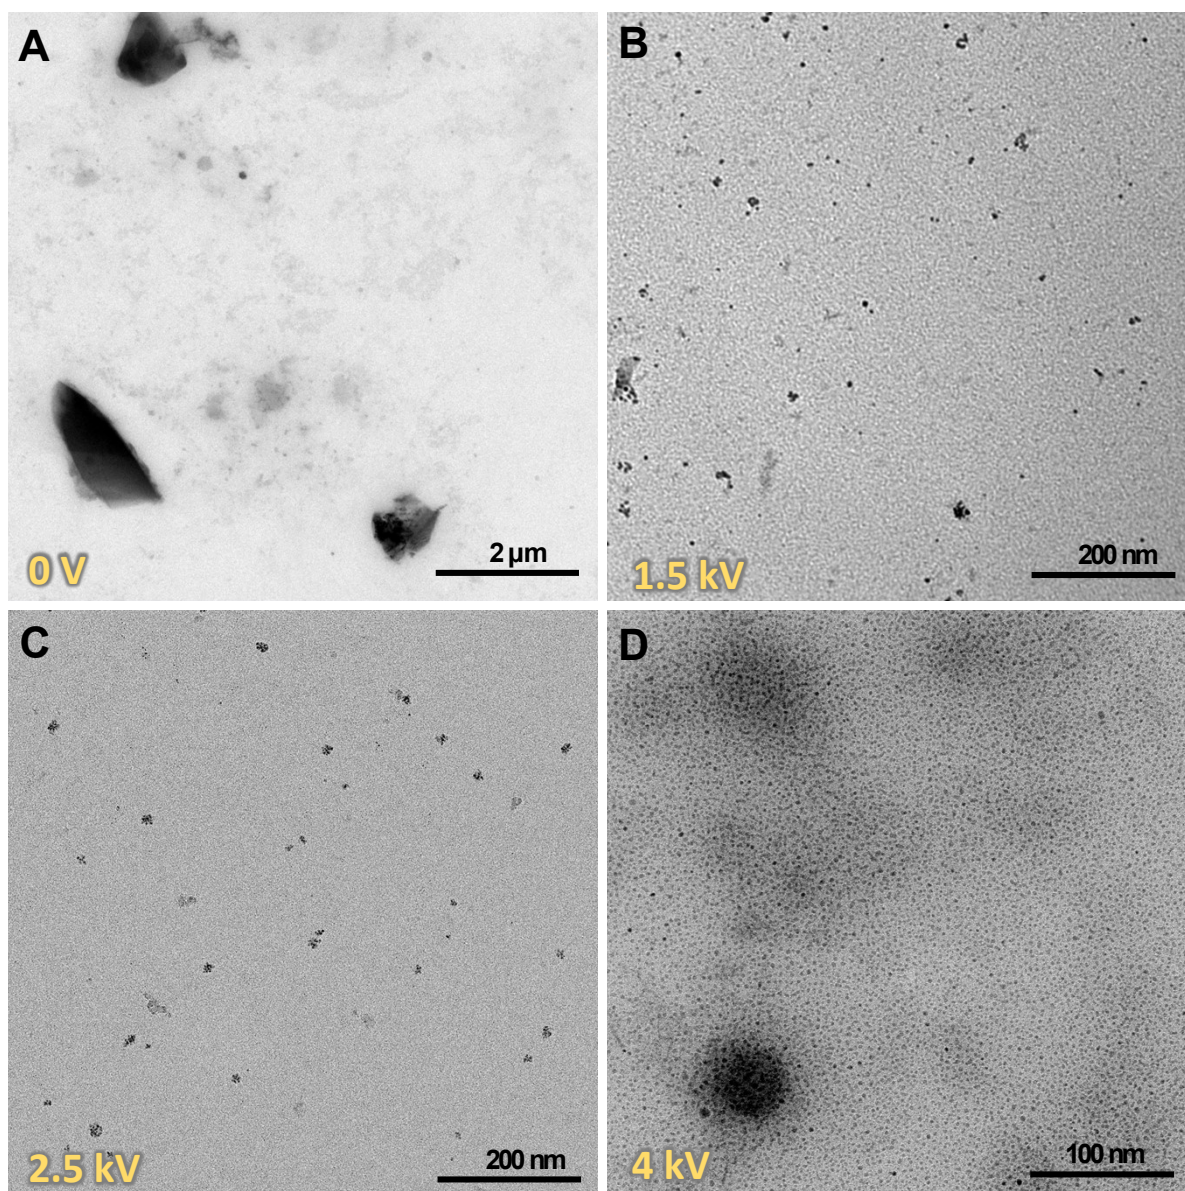

Figure S3. TEM images demonstrating voltage-dependent Cu particle disintegration, A) 0V, showing partial disintegration due to mechanical stress generated by the gas pressure of 50 psi. B-D) 1.5, 2.5, and 4 kV of applied potential demonstrating progressive size reduction in the resulting nanoparticles.
